# Supplementary material for: Genome-wide analysis of alternative splicing during human heart development
Source: PubMed Central journal article supplement (PMC5067579; doi:10.1038/srep35520), 2016-10-18
Supplement: srep35520-s1.pdf [file srep35520-s1.pdf]

# **Genome-wide analysis of alternative splicing during human heart development**

He Wang, MD<sup>1,3\*</sup>; Yanmei Chen, MD<sup>1\*</sup>; Xinzhong Li, MD<sup>1</sup>; Guojun Chen, MD<sup>1</sup>;  
Lintao Zhong, MD<sup>1</sup>; Gangbing Chen MD<sup>1</sup>, Yulin Liao, MD<sup>1</sup>; Wangjun Liao, MD, PhD<sup>2</sup>;  
and Jianping Bin, MD, PhD<sup>1,†</sup>

<sup>1</sup>Department of Cardiology, State Key Laboratory of Organ Failure Research,  
Nanfang Hospital, Southern Medical University, Guangzhou 510515, China

<sup>2</sup>Department of Oncology, Nanfang Hospital, Southern Medical University,  
Guangzhou 510515, China

<sup>3</sup>Department of Cardiology, Second Affiliated Hospital of Nanchang University,  
Jiangxi 330006, China.

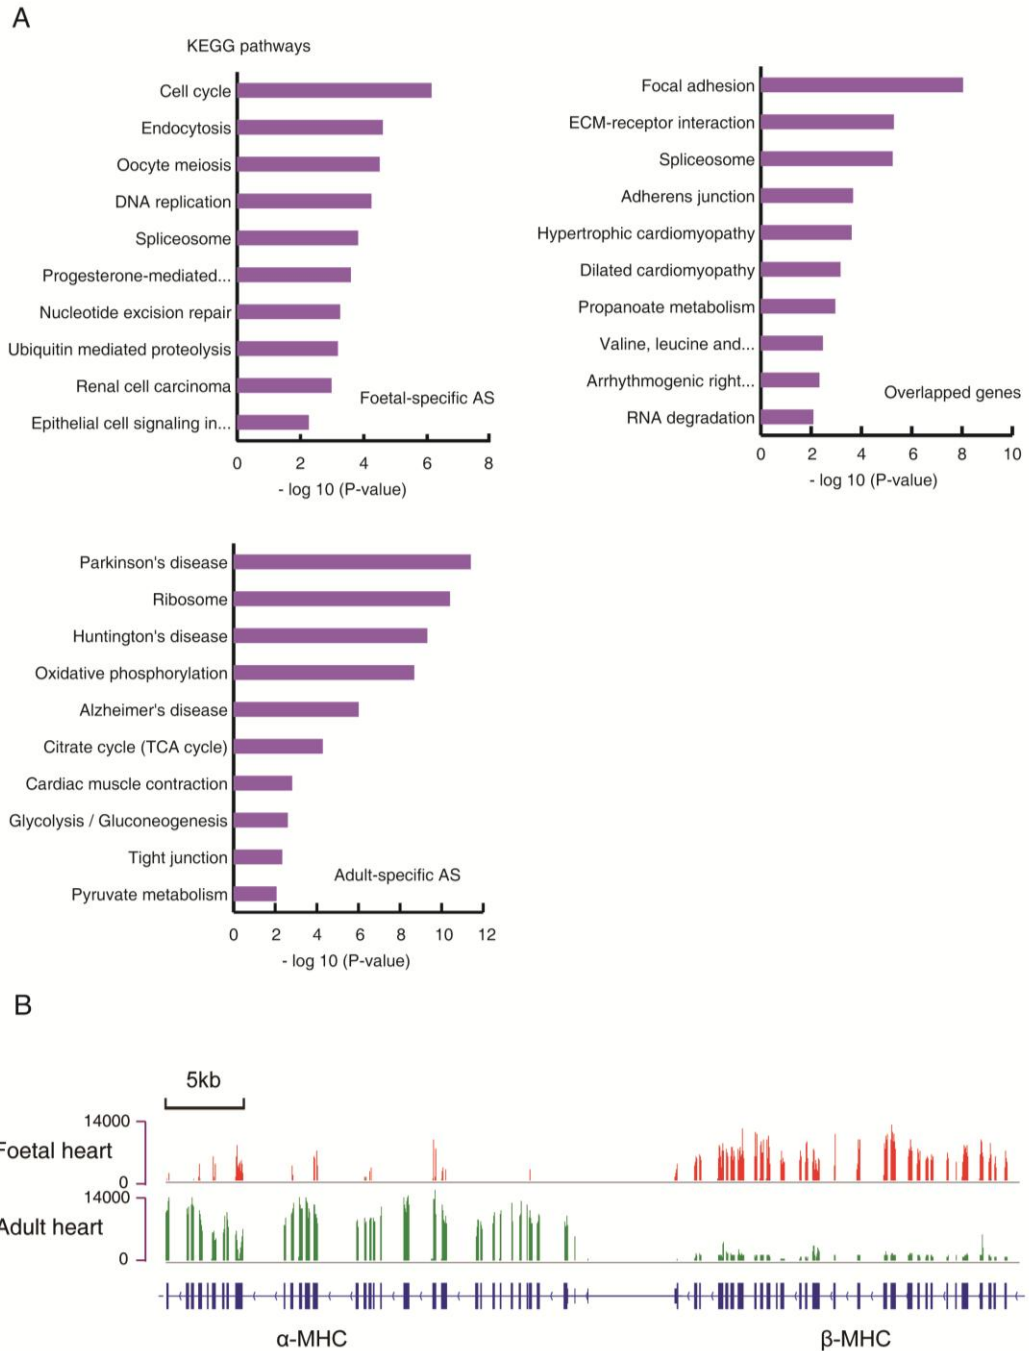

**Figure S1** The Kyoto Encyclopaedia of Genes and Genomes(KEGG) pathway analysis of specific AS genes. (A) KEGG pathway analysis of foetal/adult-specific AS genes. (B) RNA-sequencing read density plot for  $\alpha$ -MHC and  $\beta$ -MHC between fetal and adult hearts. Foetal-specific AS, gene with specific AS events in foetal hearts; overlapped genes, overlapped genes of foetal- and adult-specific AS; adult specific AS, gene with specific AS events in adult hearts.

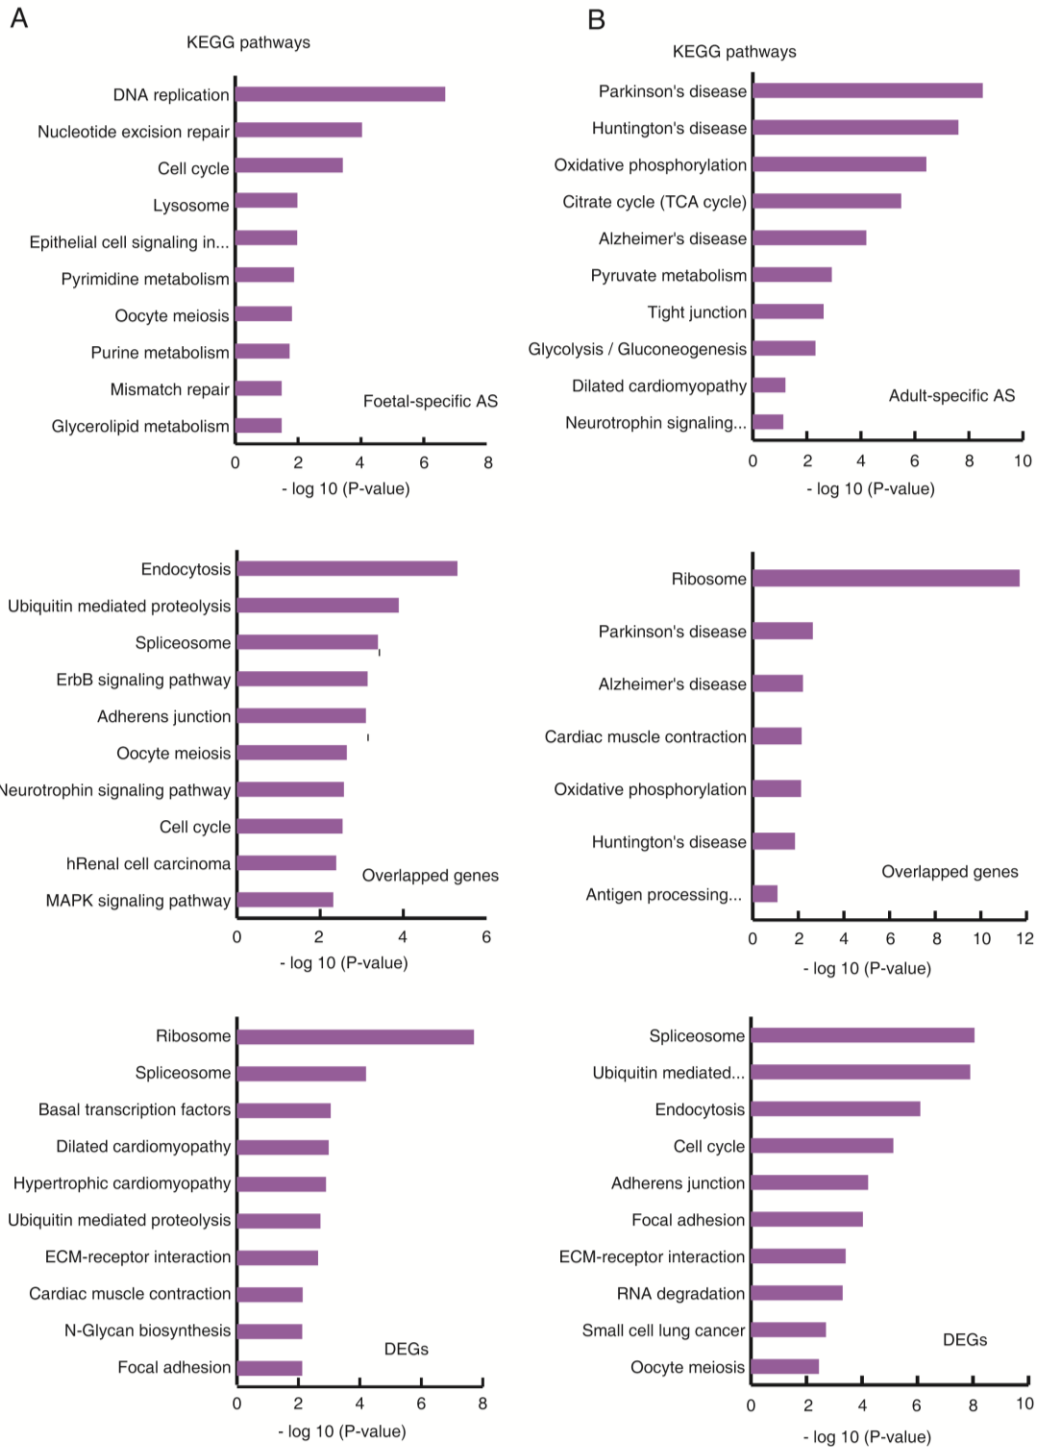

**Figure S2.** The KEGG pathway analysis of specific AS genes and DEGs. (A) The KEGG pathway analysis of foetal specific AS and DE genes. (B) The KEGG pathway analysis of adult specific AS and DE genes. DEGs, differentially expressed genes between foetal and adult hearts; foetal specific AS, gene with specific AS events in foetal hearts; adult specific AS, gene with adult AS events in adult hearts; overlapped genes, overlapped genes of foetal(A) or adult(B) specific AS and DEGs.

**Table S1.** Foetal specific AS genes differential expressed associate with cell cycle

| Gene ID | Chr   | Strand | Alternative splite (h19)                                                                                                                                               |
|---------|-------|--------|------------------------------------------------------------------------------------------------------------------------------------------------------------------------|
| 472     | chr11 | +      | 108142134-108143257, 108203628-108204611, 108205837-108206570                                                                                                          |
| 545     | chr3  | -      | 142259877-142261505                                                                                                                                                    |
| 580     | chr2  | -      | 215632379-215633954                                                                                                                                                    |
| 699     | chr2  | -      | 111398783-111398882, 111399042-111399217, 111399381-111399694, 111411101-111413314, 111413494-111414611, 111415223-111415985, 111416320-111417553, 111425283-111425372 |
| 815     | chr5  | -      | 149607850-149610866                                                                                                                                                    |
| 817     | chr4  | -      | 114430793-114430828, 114375672-114376880, 114378720-114381301, 114434527-114434984, 114424091-114424133, 114429391-114429424                                           |
| 904     | chr12 | -      | 49091967-49093559                                                                                                                                                      |
| 905     | chr2  | +      | 135700245-135703669, 135710282-135710798                                                                                                                               |
| 983     | chr10 | +      | 62547817-62547988                                                                                                                                                      |
| 991     | chr1  | +      | 43825493-43825638                                                                                                                                                      |
| 994     | chr20 | +      | 3780977-3781107, 3781146-3781388, 3781513-3781616, 3782748-3782926, 3783024-3783555                                                                                    |
| 1020    | chr7  | -      | 150753724-150753821                                                                                                                                                    |
| 1062    | chr4  | -      | 104068804-104069999, 104070566-104072374, 104079616-104079769, 104082615-10408429, 104096061-104097115, 104117196-104117318                                            |
| 1063    | chr1  | +      | 214825230-214826169                                                                                                                                                    |
| 1762    | chr19 | -      | 46287549-46287897, 46287974-46288850                                                                                                                                   |
| 2033    | chr22 | +      | 41533795-41536142, 41542821-41543839, 41543951-41545040, 41545180-41545763, 41546203-41547835, 41558784-41560055                                                       |
| 2873    | chr17 | +      | 80012385-80012686, 80014643-80014714, 80014851-80014927, 80014715-80014850                                                                                             |
| 3054    | chrX  | -      | 153218410-153219056, 153222512-153222763, 153224218-153224780, 153225613-153225684, 153227100-153227671, 153227758-153228674, 153228885-153229573, 153229736-153230027 |
| 3619    | chr11 | +      | 61906478-61907704, 61912762-61913099                                                                                                                                   |
| 3838    | chr17 | +      | 66042038-66042618                                                                                                                                                      |
| 3925    | chr1  | -      | 26231230-26232878                                                                                                                                                      |
| 3980    | chr17 | +      | 33325316-33325621, 33326469-33326799                                                                                                                                   |
| 4288    | chr10 | -      | 129914272-129914753                                                                                                                                                    |
| 4297    | chr11 | +      | 118370136-118370548, 118370629-118371700                                                                                                                               |

---

|      |       |   |                                                                                                                                                                |
|------|-------|---|----------------------------------------------------------------------------------------------------------------------------------------------------------------|
| 4751 | chr1  | + | 211842675-211843621, 211843750-211844542                                                                                                                       |
| 4853 | chr1  | - | 120491190-120491628, 120462237-120462850,<br>120468434-120469120                                                                                               |
| 5310 | chr10 | - | 75206249-75206334, 75204581-75206248                                                                                                                           |
| 5701 | chr7  | + | 102996140-102996240                                                                                                                                            |
| 5716 | chrX  | - | 107331083-107331181                                                                                                                                            |
| 5810 | chr5  | - | 34909462-34911657                                                                                                                                              |
| 5932 | chr18 | + | 20573603-20573682, 20596790-20596887                                                                                                                           |
| 6045 | chr1  | + | 185062192-185062408                                                                                                                                            |
| 6598 | chr22 | + | 24133942-24134054                                                                                                                                              |
| 6787 | chr3  | - | 52780921-52783706                                                                                                                                              |
| 6790 | chr20 | - | 54967223-54967351, 54945397-54945539<br>54958233-54959324, 54965611-54965721                                                                                   |
| 6868 | chr2  | - | 9676052-9676825                                                                                                                                                |
| 6929 | chr19 | - | 1612205-1612429, 1621970-1622051                                                                                                                               |
| 6934 | chr10 | + | 114910741-114910882                                                                                                                                            |
| 7283 | chr17 | + | 40764525-40764963, 40766431-40766512                                                                                                                           |
| 7465 | chr11 | + | 9597841-9598032, 9607075-9607994                                                                                                                               |
| 8239 | chrX  | + | 41088819-41089080, 41055613-41055843<br>41055992-41056615                                                                                                      |
| 8438 | chr1  | + | 46743653-46743742                                                                                                                                              |
| 8450 | chrX  | - | 119672065-119672513, 119680472-119680989                                                                                                                       |
| 8453 | chr10 | - | 35318569-35320226, 35320315-35320417                                                                                                                           |
| 8658 | chr8  | + | 9592595-9592885, 9623308-9623747                                                                                                                               |
| 8697 | chr5  | - | 137542235-137542369, 137527225-137527549<br>137527627-137527956                                                                                                |
| 9055 | chr15 | - | 91512753-91512853                                                                                                                                              |
| 9126 | chr10 | + | 112343307-112343597, 112349750-112350168<br>112350331-112350747, 112359571-112360195<br>112360305-112360778, 112362424-112362581<br>112362761-112362940        |
| 9181 | chr1  | - | 155934778-155934919                                                                                                                                            |
| 9493 | chr15 | + | 69717620-69718521, 69718522-69718673<br>69732417-69732645, 69737381-69738346                                                                                   |
| 9611 | chr17 | - | 16029395-16029523                                                                                                                                              |
| 9738 | chr16 | + | 19556221-19556414                                                                                                                                              |
| 9787 | chr14 | - | 55615192-55615310, 55647497-55647929                                                                                                                           |
| 9793 | chr11 | - | 46774261-46774858, 46780594-46780817<br>46791649-46792336, 46799103-46799687,<br>46799864-46800008, 46801870-46801976,<br>46818491-46819353, 46819520-46819631 |
| 9874 | chr2  | - | 171850467-171853161                                                                                                                                            |
| 9918 | chr12 | + | 6619977-6620274, 6626192-6626529<br>6626666-6626760, 6626850-6626943                                                                                           |

---

---

|       |       |   |                                          |
|-------|-------|---|------------------------------------------|
|       |       |   | 6635782-6636055, 6636230-6636941         |
|       |       |   | 6637055-6637132, 6637258-6637337         |
|       |       |   | 6638023-6638109, 6639984-6640085         |
|       |       |   | 6640243-6640491                          |
| 9988  | chr7  | + | 86810658-86811542                        |
| 10015 | chr3  | + | 33870329-33870461                        |
| 10179 | chr11 | + | 114276427-114276521                      |
| 10198 | chr12 | - | 123686867-123687169, 123687632-123687795 |
| 10274 | chr3  | - | 136140006-136141250, 136141700-136141792 |
| 10615 | chr17 | - | 26913017-26913106                        |
| 10801 | chr17 | + | 75486942-75488701                        |
| 11004 | chr1  | + | 45219506-45220420, 45221656-45221745     |
| 11044 | chr5  | + | 6738843-6739843                          |
| 11064 | chr9  | + | 123911140-123912446, 123914972-123916997 |
| 11104 | chr6  | - | 149918778-149919358                      |
| 11113 | chr12 | - | 120139558-120139653, 120151100-120151271 |
| 11190 | chr20 | + | 34054898-34055127                        |
| 11258 | chr9  | - | 34617969-34618671                        |
| 22974 | chr20 | + | 30363792-30365288, 30365442-30366614     |
| 23047 | chr13 | + | 33332358-33332670, 33344699-33344790     |
| 23310 | chr11 | - | 134026991-134027821, 134073094-134073547 |
| 23332 | chr2  | - | 122144805-122145337                      |
| 23435 | chr1  | + | 11076900-11077064                        |
| 23637 | chr9  | + | 125836708-125838522, 125861829-125863843 |
| 24149 | chr6  | - | 43309950-43310412                        |
| 25836 | chr5  | + | 37000991-37001089, 37006691-37007423     |
|       |       |   | 37007577-37008108                        |
| 25936 | chr1  | - | 212955769-212957703                      |
| 26586 | chr13 | + | 53036703-53039428                        |
| 27436 | chr2  | + | 42522400-42522519                        |
| 29127 | chr12 | - | 50386161-50386331                        |
| 29945 | chr4  | + | 25404649-25407193                        |
| 51529 | chr17 | + | 79849598-79849717, 79849710-79851426     |
|       |       |   | 79849718-79851426                        |
| 54443 | chr7  | + | 36463553-36464152, 36464203-36464293     |
|       |       |   | 36456688-36456799                        |
| 54790 | chr4  | + | 106180927-106182914                      |
| 54930 | chr14 | - | 23420763-23420898                        |
| 55183 | chr2  | + | 152300224-152301850, 152316634-152317650 |
|       |       |   | 152317804-152318754, 152318837-152318924 |
|       |       |   | 152325271-152326223                      |
| 55213 | chr13 | - | 50140905-50141288                        |
| 55544 | chr20 | + | 55968334-55968389                        |
| 55749 | chr10 | + | 70515294-70516028, 70500385-70500418     |

---

---

|        |       |   |                                                                                                          |
|--------|-------|---|----------------------------------------------------------------------------------------------------------|
| 56647  | chr10 | + | 127522516-127524671                                                                                      |
| 60561  | chr7  | + | 105205905-105205975                                                                                      |
| 79858  | chr3  | + | 130887782-130889615                                                                                      |
| 84962  | chr14 | - | 23443325-23444046, 23445728-23445852                                                                     |
| 115426 | chr9  | + | 6481767-6481990                                                                                          |
| 116138 | chr6  | + | 42986295-42986369, 42986904-42987024<br>42987105-42988403, 42985256-42985433                             |
| 116840 | chr17 | + | 7852399-7852475, 7836668-7837454<br>7840136-7840480, 7851646-7851803<br>7851938-7852401, 7852476-7852701 |
| 151011 | chr2  | - | 110332157-110332344                                                                                      |
| 283431 | chr12 | + | 100994329-100995414                                                                                      |
| 348995 | chr6  | - | 150057759-150059777, 150067199-150067510                                                                 |

---
